# Supplementary material for: Hydrolytic Degradation of Polylactic Acid Fibers as a Function of pH and Exposure Time
Source: MDPI journal article supplement (doi:10.3390/molecules26247554), 2021-12-13
Supplement: s1 [file s1]

## Article

# Hydrolytic Degradation of Polylactic Acid Fibers as a Function of pH and Exposure Time

Radhika Vaid <sup>1</sup>, Erol Yildirim <sup>2</sup>, Melissa A. Pasquinelli <sup>1,3</sup> and Martin W. King <sup>1,4,\*</sup>

<sup>1</sup> Fiber and Polymer Science Program, Wilson College of Textiles, NC State University, Raleigh, NC 27606, USA; rvaid@ncsu.edu (R.V.); melissa\_pasquinelli@ncsu.edu (M.A.P.)

<sup>2</sup> Department of Chemistry, Middle East Technical University, 06800 Ankara, Turkey; erolyil@metu.edu.tr

<sup>3</sup> Department of Forest Biomaterials, College of Natural Resources, NC State University, Raleigh, NC 27606, USA

<sup>4</sup> College of Textiles, Donghua University, Shanghai 201620, China

\* Correspondence: mwking2@ncsu.edu; Tel.: +1-919-291-2563

## Appendix A: XRD Analysis

**Table S1.** Peak height and area ratios with respect to highest intensity peak measured from XRD.

| pH<br>Peak Ratios |                        | 10     | 7.4    | 3      | 2      | Control |
|-------------------|------------------------|--------|--------|--------|--------|---------|
| 16.4:28.5         | Peak Height Ratio      | 70.15  | 65.13  | 70.96  | 68.11  | -       |
| 16.4:28.5         | Area Under Curve Ratio | 150.28 | 155.63 | 187.21 | 223.68 | -       |

**Citation:** Vaid, R.; Yildirim, E.; Pasquinelli, M.A.; King, M.W. Hydrolytic Degradation of Polylactic Acid Fibers as a Function of pH and Exposure Time. *Molecules* **2021**, *26*, 7554. <https://doi.org/10.3390/molecules26247554>

Academic Editor: Mihai Brebu

Received: 1 November 2021

Accepted: 19 November 2021

Published: 13 December 2021

**Publisher's Note:** MDPI stays neutral with regard to jurisdictional claims in published maps and institutional affiliations.

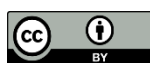

**Copyright:** © 2021 by the authors. Submitted for possible open access publication under the terms and conditions of the Creative Commons Attribution (CC BY) license (<http://creativecommons.org/licenses/by/4.0/>).

## Appendix B: Fukui Analysis

Table S2: Fukui analysis illustrating charge distribution for the atoms in PLA chain, where Figures S2, S3 and S4 illustrate a pictorial representation for nucleophilic, electrophilic and radical addition, respectively.

| Atom | Atom Type | f(nuc)   | f(elec)  | f(radikal) |
|------|-----------|----------|----------|------------|
| 1    | C         | 0.00042  | 0.00209  | 0.001255   |
| 2    | O         | 0.03854  | 0.03916  | 0.03885    |
| 3    | C         | 0.05058  | 0.00185  | 0.026215   |
| 4    | O         | 0.01693  | 0.01132  | 0.014125   |
| 5    | H         | 0.0125   | 0.00655  | 0.009525   |
| 6    | C         | -0.00045 | -0.00115 | -0.0008    |
| 7    | H         | 0.00501  | 0.00426  | 0.004635   |
| 8    | H         | 0.0051   | 0.0046   | 0.00485    |
| 9    | H         | 0.01165  | 0.00458  | 0.008115   |
| 10   | H         | 0.00715  | 0.00367  | 0.00541    |
| 11   | C         | 0.00215  | 0.00475  | 0.00345    |
| 12   | O         | 0.03347  | 0.0716   | 0.052535   |
| 13   | C         | 0.03587  | 0.00156  | 0.018715   |
| 14   | O         | 0.01304  | 0.01859  | 0.015815   |
| 15   | H         | 0.02395  | 0.01147  | 0.01771    |
| 16   | C         | -0.00312 | -0.00147 | -0.00229   |
| 17   | H         | 0.00729  | 0.00676  | 0.007025   |
| 18   | H         | 0.00712  | 0.0066   | 0.00686    |
| 19   | H         | 0.01135  | 0.00749  | 0.00942    |
| 20   | C         | -0.00012 | 0.00656  | 0.00322    |
| 21   | O         | 0.06375  | 0.09287  | 0.07831    |
| 22   | C         | 0.07963  | 0.00125  | 0.04044    |

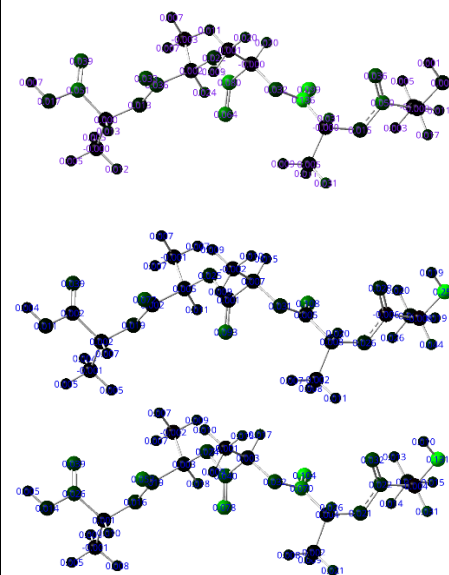

Figure S1: Nucleophilic, electrophilic and radical attack sites for PLA pentamer. High reactivity sites are shown by green color.

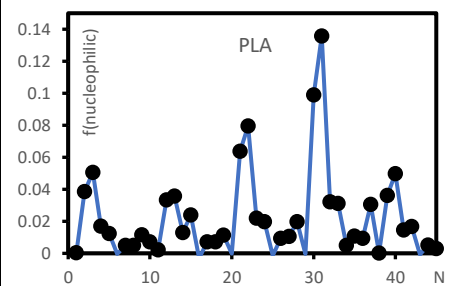

Figure S2: Fukui reactivity indices for nucleophilic addition

|    |   |          |          |          |
|----|---|----------|----------|----------|
| 23 | O | 0.02201  | 0.02508  | 0.023545 |
| 24 | H | 0.01978  | 0.015    | 0.01739  |
| 25 | C | -0.00132 | -0.00158 | -0.00145 |
| 26 | H | 0.0094   | 0.00878  | 0.00909  |
| 27 | H | 0.01069  | 0.00857  | 0.00963  |
| 28 | H | 0.01988  | 0.00963  | 0.014755 |
| 29 | C | -0.00038 | 0.00801  | 0.003815 |
| 30 | O | 0.09893  | 0.10848  | 0.103705 |
| 31 | C | 0.13587  | 0.00469  | 0.07028  |
| 32 | O | 0.03216  | 0.03092  | 0.03154  |
| 33 | H | 0.03113  | 0.02042  | 0.025775 |
| 34 | C | 0.00504  | -0.00169 | 0.001675 |
| 35 | H | 0.0109   | 0.00769  | 0.009295 |
| 36 | H | 0.0094   | 0.00704  | 0.00822  |
| 37 | H | 0.03067  | 0.01122  | 0.020945 |
| 38 | C | 0.00013  | -0.0083  | -0.00409 |
| 39 | O | 0.03619  | 0.02773  | 0.03196  |
| 40 | C | 0.04972  | -0.00615 | 0.021785 |
| 41 | O | 0.01469  | 0.02642  | 0.020555 |
| 42 | H | 0.01689  | 0.0442   | 0.030545 |
| 43 | C | -0.00076 | 0.01088  | 0.00506  |
| 44 | H | 0.00522  | 0.01986  | 0.01254  |
| 45 | H | 0.00307  | 0.02583  | 0.01445  |
| 46 | H | 0.01105  | 0.01852  | 0.014785 |
| 47 | O | 0.00677  | 0.25466  | 0.130715 |

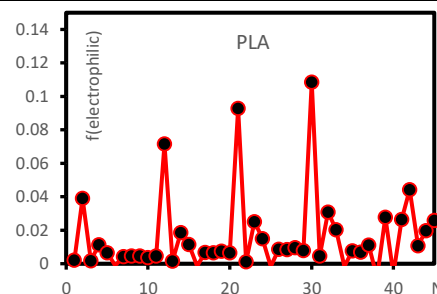

Figure S3: Fukui reactivity indices for electrophilic addition

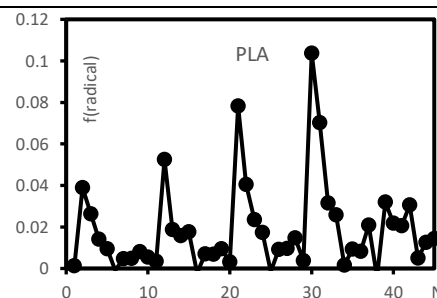

Figure S4: Fukui reactivity indices for radical addition

|    |   |         |         |          |  |
|----|---|---------|---------|----------|--|
| 48 | H | 0.00108 | 0.01909 | 0.010085 |  |
|----|---|---------|---------|----------|--|

## References

- Barrows, T. Degradable implant materials: A review of synthetic absorbable polymers and their applications. *Clin. Mater.* **1986**, *1*, 233–257, [https://doi.org/10.1016/s0267-6605\(86\)80015-4](https://doi.org/10.1016/s0267-6605(86)80015-4).
- Gomes, M.; Reis, R.L. Biodegradable polymers and composites in biomedical applications: From catgut to tissue engineering. Part 1 Available systems and their properties. *Int. Mater. Rev.* **2004**, *49*, 261–273, <https://doi.org/10.1179/095066004225021918>.
- Papazoglou, L.G.; Tsioli, V.; Papaioannou, N.; Georgiadis, M.; Savvas, I.; Prassinou, N.; Zavros, N. Comparison of absorbable and nonabsorbable sutures for intradermal skin closure in cats. *Can. Vet. J.* **2010**, *51*, 770.
- Sajid, M.S.; McFall, M.R.; Whitehouse, P.A.; Sains, P.S. Systematic review of absorbable vs non-absorbable sutures used for the closure of surgical incisions. *World J. Gastrointest. Surg.* **2014**, *6*, 241.
- Luckachan, G.E.; Pillai, C.K.S. Biodegradable Polymers- A Review on Recent Trends and Emerging Perspectives. *J. Polym. Environ.* **2011**, *19*, 637–676, <https://doi.org/10.1007/s10924-011-0317-1>.
- Suzuki, S.; Ikaka, Y. *Sutures for Wound Closure. Biomaterials for Surgical Operation Electronic Resource*, 189–196; Humana Press: Totowa, NJ, USA, Springer: Berlin/Heidelberg, Germany, 2012.
- Chen, G.-Q.; Wu, Q. The application of polyhydroxyalkanoates as tissue engineering materials. *Biomaterials* **2005**, *26*, 6565–6578, <https://doi.org/10.1016/j.biomaterials.2005.04.036>.
- Williams, S.F.; Rizk, S.; Martin, D.P. Poly-4-hydroxybutyrate (P4HB): A new generation of resorbable medical devices for tissue repair and regeneration. *Biomed. Eng.* **2013**, *58*, 1–13.
- Nair, N.; Laurencin, C.T. Biodegradable polymers as biomaterials. *Prog. Polym. Sci.* **2007**, *32*, 762–798.
- Gajjar, C.R.; King, M.W. *Resorbable Fiber-Forming Polymers for Biotextile Applications*, 1st ed.; Springer: Berlin/Heidelberg, Germany, 2014.
- Vroman, I.; Tighzert, L. Biodegradable polymers. *Materials* **2009**, *2*, 307–344.
- Ulery, B.D.; Nair, L.S.; Laurencin, C.T. Biomedical applications of biodegradable polymers. *J. Polym. Sci. B Polym. Phys.* **2011**, *49*, 832–864.
- King, M.W.; Gupta, B.S.; Guidoin, R. (Eds.) *Biotextiles as Medical Implants*; Woodhead Publishing: Cambridge, UK, 2014.
- Schlick, T. *Molecular Modeling and Simulation: An Interdisciplinary Guide*; Springer: New York, NY, USA, 2002.
- Hinchliffe, A. *Molecular Modelling for Beginners*, 1. Aufl. ed.; Wiley: Hoboken, NJ, USA, 2005.
- Astuti, A.D.; Mutiara, A.B. Performance Analysis on Molecular Dynamics Simulation of Protein Using GROMACS. *arXiv* **2009** arXiv:0912.0893.
- Glötzer, S.C.; Paul, W. Molecular and Mesoscale Simulation Methods for Polymer Materials. *Annu. Rev. Mater. Res.* **2002**, *32*, 401–436, <https://doi.org/10.1146/annurev.matsci.32.010802.112213>.
- Deshmukh, S.A.; Hanson, B.J.; Jiang, Q.; Pasquinelli, M.A. Perspectives on the Use of Molecular Dynamics Simulations to Characterize Filler-Matrix Adhesion and Nanocomposite Mechanical Properties. *Interface/Interphase in Polymer Nanocomposites*; John Wiley & Sons, Inc: Hoboken, NJ, USA, 2016; pp. 379–411.
- Ishimoto, T.; Koyama, M. A review of molecular-level mechanism of membrane degradation in the polymer electro-lyte fuel cell. *Membranes* **2012**, *2*, 395–414.
- Yu, T.H.; Sha, Y.; Liu, W.-G.; Merinov, B.V.; Shirvanian, P.; Goddard, W.A. Mechanism for Degradation of Nafion in PEM Fuel Cells from Quantum Mechanics Calculations. *J. Am. Chem. Soc.* **2011**, *133*, 19857–19863, <https://doi.org/10.1021/ja2074642>.
- Smith, K.D.; Stoliarov, S.I.; Nyden, M.R.; Westmoreland, P.R. RMDff: A smoothly transitioning, forcefield-based representation of kinetics for reactive molecular dynamics simulations. *Mol. Simul.* **2007**, *33*, 361–368, <https://doi.org/10.1080/08927020601156392>.
- Liang, T.; Devine, B.; Phillpot, S.R.; Sinnott, S.B. Variable Charge Reactive Potential for Hydrocarbons to Simulate Organic-Copper Interactions. *J. Phys. Chem. A* **2012**, *116*, 7976–7991, <https://doi.org/10.1021/jp212083t>.
- Van Duin, A.C.T.; Dasgupta, S.; Lorant, F.; Goddard, W.A. ReaxFF: A Reactive Force Field for Hydrocarbons. *J. Phys. Chem. A* **2001**, *105*, 9396–9409, doi:10.1021/jp004368u.
- Chenoweth, K.; Cheung, S.; van Duin, A.C.T.; Goddard, W.A.; Kober, E.M. Simulations on the thermal decomposition of a poly(dimethylsiloxane) polymer using the ReaxFF reactive force field. *J. Am. Chem. Soc.* **2005**, *127*, 7192–7202.
- Chenoweth, K.; van Duin, A.C.T.; Goddard, W.A. ReaxFF reactive force field for molecular dynamics simulations of hydrocarbon oxidation. *J. Phys. Chem. A* **2008**, *112*, 1040.
- van Duin, A.C.T.; Merinov, B.V.; Jang, S.S.; Goddard, W.A. ReaxFF Reactive Force Field for Solid Oxide Fuel Cell Systems with Application to Oxygen Ion Transport in Yttria-Stabilized Zirconia. *J. Phys. Chem. A* **2008**, *112*, 3133–3140, <https://doi.org/10.1021/jp076775c>.
- Chenoweth, K.; van Duin, A.C.T.; Persson, P.; Cheng, M.; Oxgaard, J.; Goddard, W.A. Development and application of a ReaxFF reactive force field for oxidative dehydrogenation on vanadium oxide catalysts. *J. Phys. Chem. C* **2008**, *112*, 14645.
- Sanz-Navarro, C.F.; Åstrand, P.-O.; Chen, D.; Rønning, M.; van Duin, A.C.T.; Jacob, T.; Goddard, W.A. Molecular Dynamics Simulations of the Interactions between Platinum Clusters and Carbon Platelets. *J. Phys. Chem. A* **2008**, *112*, 1392–1402, <https://doi.org/10.1021/jp074806y>.

29. Ojwang, J.G.O.; Van Santen, R.; Kramer, G.J.; Van Duin, A.C.; Goddard III, W.A. Modeling the sorption dynamics of NaH using a reactive force field. *J. Chem. Phys.* **2008**, *128*, 9.
30. Karatrantos, A.; Clarke, N.; Kröger, M. Modeling of polymer structure and conformations in polymer nanocompo-sites from atomistic to mesoscale: A review. *Polym. Rev.* **2016**, *56*, 385–428.
31. Chen, X.; Yuan, C.A.; Wong, C.K.; Ye, H.; Leung, S.Y.; Zhang, G. Molecular modeling of protonic acid doping of emeraldine base polyaniline for chemical sensors. *Sens. Actuators B Chem.* **2012**, *174*, 210–216, <https://doi.org/10.1016/j.snb.2012.08.042>.
32. Gajjar, C.R.; Stallrich, J.W.; Pasquinelli, M.A.; King, M.W. *ACS Omega* **2021**, *6* (24), 15920–15928, doi: 10.1021/acsomega.1c01557.
33. Origin(Pro), Version 2019b, OriginLab Corporation, Northampton, MA, USA, <https://www.originlab.com/2019b>.
34. Scienomics MAPS version 4.2.0., [www.scienomics.com](http://www.scienomics.com). (Accessed on 26 May 2017).
35. Aktulga, H. M.; Fogarty, J. C.; Pandit, S. A.; Grama, A. Y. Parallel reactive molecular dynamics: Numerical methods and algorithmic techniques. *Parallel Computing* **2012**, *38*, 245–259, <https://doi.org/10.1016/j.parco.2011.08.005>.
36. Fedkin, M.V.; Shin, Y.K.; Dasgupta, N.; Yeon, J.; Zhang, W.; van Duin, D.; van Duin, A.C.T.; Mori, K.; Fujiwara, A.; Machida, M.; Nakamura, H.; Okumura, M. Development of the ReaxFF Methodology for Electrolyte–Water Systems. *J. Phys. Chem. A* **2019**, *123* (10), 2125–2141, <https://doi.org/10.1021/acs.jpca.8b10453>.
37. Valentina, I.; Haroutioun, A.; Fabrice, L.; Vincent, V.; Roberto, P. Poly (Lactic Acid)-Based Nanobiocomposites with Modulated Degradation Rates. *Materials* **2018**, *11*, 1943, <https://doi.org/10.3390/ma11101943>.
38. Gaussian 16, Revision A.03. Frisch, M. J.; Trucks, G. W.; Schlegel, H. B.; Scuseria, G. E.; Robb, M. A.; Cheeseman, J. R.; Scalmani, G.; Barone, V.; Petersson, G. A.; Nakatsuji, H.; Li, M.; Caricato, X.; Marenich, A. V.; Bloino, J.; Janesko, B. G.; Gomperts, R.; Mennucci, B.; Hratchian, H. P.; Ortiz, J. V.; Izmaylov, A. F.; Sonnenberg, J. L.; Williams-Young, D.; Ding, F.; Lipparini, F.; Egidi, F.; Goings, J.; Peng, B.; Petrone, A.; Henderson, T.; Ranasinghe, D.; Zakrzewski, V. G.; Gao, J.; Rega, N.; Zheng, G.; Liang, W.; Hada, M.; Ehara, M.; Toyota, K.; Fukuda, R.; Hasegawa, J.; Ishida, M.; Nakajima, T.; Honda, Y.; Kitao, O.; Nakai, H.; Vreven, T.; Throssell, K.; Montgomery, J. A., Jr.; Peralta, J. E.; Ogliaro, F.; Bearpark, M. J.; Heyd, J. J.; Brothers, E. N.; Kudin, K. N.; Staroverov, V. N.; Keith, T. A.; Kobayashi, R.; Normand, J.; Raghavachari, K.; Rendell, A. P.; Burant, J. C.; Iyengar, S. S.; Tomasi, J.; Cossi, M.; Millam, J. M.; Klene, M.; Adamo, C.; Cammi, R.; Ochterski, J. W.; Martin, R. L.; Morokuma, K.; Farkas, O.; Foresman, J. B.; Fox, D. J. Gaussian, Inc., Wallingford CT, 2016.
39. Yildirim, E.; Dakshinamoorthy, D.; Peretic, M.J.; Pasquinelli, M.A.; Mathers, R.T. Synthetic Design of Polyester Electrolytes Guided by Hydrophobicity Calculations. *Macromolecules* **2016**, *49*, 7868–7876, <https://doi.org/10.1021/acs.macromol.6b01452>.
40. Gilardoni, F.; Weber, J.; Chermette, H.; Ward, T.R. Reactivity indices in density functional theory: A new evaluation of the condensed Fukui function by numerical integration. *J. Phys. Chem. A* **1998**, *102*, 3607–3613.
41. Berger, G. Using conceptual density functional theory to rationalize regioselectivity: A case study on the nucleophilic ring-opening of activated aziridines. *Comput. Theor. Chem.* **2013**, *1010*, 11–18, <https://doi.org/10.1016/j.comptc.2012.12.029>.
42. Xu, L.; Crawford, K.; Gorman, C.B. Effects of Temperature and pH on the Degradation of Poly (lactic acid) Brushes. *Macromolecules* **2011**, *44*, 4777–4782, <https://doi.org/10.1021/ma2000948>.
43. Zhang, L.; Zhao, G.; Wang, G. Investigation on the  $\alpha/\delta$  Crystal Transition of Poly(L-lactic Acid) with Different Molecular Weights. *Polymers* **2021**, *13*, 3280, 1–16, <https://doi.org/10.3390/polym13193280>.
44. Chu, C.C. Hydrolytic degradation of polyglycolic acid: Tensile strength and crystallinity study. *J. Appl. Polym. Sci.* **1981**, *26*, 1727–1734, <https://doi.org/10.1002/app.1981.070260527>.
45. de Jong, S.; Arias, E.; Rijkers, D.T.; van Nostrum, C.; Bosch, J.K.-V.D.; Hennink, W. New insights into the hydrolytic degradation of poly(lactic acid): Participation of the alcohol terminus. *Polymer* **2001**, *42*, 2795–2802, [https://doi.org/10.1016/s0032-3861\(00\)00646-7](https://doi.org/10.1016/s0032-3861(00)00646-7).
